# Supplementary material for: Sex differences in adverse events among cancer patients receiving immune checkpoint inhibitors: the MOUSEION-07 systematic review and meta-analysis
Source: Springer Nature journal article supplement (doi:10.1038/s41598-024-71746-z), 2024-11-16
Supplement: MOESM1 [file 41598_2024_71746_MOESM1_ESM.docx]

**Table 2. Search strings carried out to perform this systematic and meta-analysis study.**

| **Database** | **Results** |
| --- | --- |
| **Embase**  ('immunotherapy'/exp OR 'immunotherapy') AND ('immune checkpoint inhibitors'/exp OR 'immune checkpoint inhibitors') AND 'sex difference*' AND ('neoplasms'/exp OR 'neoplasms') AND ('adverse effect'/exp OR 'adverse effect') | 24 |
| **PubMed**  ((((immunotherapy) AND (immune checkpoint inhibitors)) AND (sex difference*)) AND (neoplasms)) AND (adverse effect)  ("immunotherapy"[MeSH Terms] OR "immunotherapy"[All Fields] OR "immunotherapies"[All Fields] OR "immunotherapy s"[All Fields]) AND ("immune checkpoint inhibitors"[Pharmacological Action] OR "immune checkpoint inhibitors"[MeSH Terms] OR ("immune"[All Fields] AND "checkpoint"[All Fields] AND "inhibitors"[All Fields]) OR "immune checkpoint inhibitors"[All Fields]) AND (("sex"[MeSH Terms] OR "sex"[All Fields]) AND "difference*"[All Fields]) AND ("neoplasm s"[All Fields] OR "neoplasms"[MeSH Terms] OR "neoplasms"[All Fields] OR "neoplasm"[All Fields]) AND (("adverse"[All Fields] OR "adversely"[All Fields] OR "adverses"[All Fields]) AND ("effect"[All Fields] OR "effecting"[All Fields] OR "effective"[All Fields] OR "effectively"[All Fields] OR "effectiveness"[All Fields] OR "effectivenesses"[All Fields] OR "effectives"[All Fields] OR "effectivities"[All Fields] OR "effectivity"[All Fields] OR "effects"[All Fields]))  Translations  immunotherapy: "immunotherapy"[MeSH Terms] OR "immunotherapy"[All Fields] OR "immunotherapies"[All Fields] OR "immunotherapy's"[All Fields]  immune checkpoint inhibitors: "immune checkpoint inhibitors"[Pharmacological Action] OR "immune checkpoint inhibitors"[MeSH Terms] OR ("immune"[All Fields] AND "checkpoint"[All Fields] AND "inhibitors"[All Fields]) OR "immune checkpoint inhibitors"[All Fields]  sex: "sex"[MeSH Terms] OR "sex"[All Fields]  neoplasms: "neoplasm's"[All Fields] OR "neoplasms"[MeSH Terms] OR "neoplasms"[All Fields] OR "neoplasm"[All Fields]  adverse: "adverse"[All Fields] OR "adversely"[All Fields] OR "adverses"[All Fields]  effect: "effect"[All Fields] OR "effecting"[All Fields] OR "effective"[All Fields] OR "effectively"[All Fields] OR "effectiveness"[All Fields] OR "effectivenesses"[All Fields] OR "effectives"[All Fields] OR "effectivities"[All Fields] OR "effectivity"[All Fields] OR "effects"[All Fields] | 20 |
| **Scopus**  (TITLE-ABS-KEY (immune AND checkpoint AND inhibitors) AND TITLE-ABS-KEY (immunotherapy) AND TITLE-ABS-KEY (sex AND difference*) AND TITLE-ABS-KEY (neoplasms) AND TITLE-ABS-KEY (adverse AND effect)) | 40 |
| **WoS**  ('immunotherapy'/exp OR 'immunotherapy') AND ('immune checkpoint inhibitors'/exp OR 'immune checkpoint inhibitors') AND 'sex difference*' AND ('neoplasms'/exp OR 'neoplasms') AND ('adverse effect'/exp OR 'adverse effect') | 0 |
